# Supplementary material
Source: PubMed Central journal article supplement (PMC5718266)
Supplement: CJN.03030317SupplementaryData.pdf [file CJN.03030317SupplementaryData.pdf]

### **Appendix: List of FRENCH Collaborators**

**National coordination:** Amiens University Hospital : Prof. Gabriel Choukroun (lead investigator, study coordinator), Dr Sophie Liabeuf, Dr Najeh El Esper, Dr Maité Jaureguy, Dr Caroline Lecaque, Prof. Ziad Massy, Prof. Jean-Marc Chillon, Dr Romuald Mentaverri, Dr Momar Diouf, Carl Picard, Jonathan Meynier, Marie-Laurence Lepilliez

#### **Local clinical centers**

*Bordeaux* : Pr Christian Combe, Marine Douillet

*Caen* : Pr Jean-Philippe Ryckelynck, Mohamed Ouethrani

*Marseille* : Pr Bertrand Dussol, Laurent Samson

*Saint Ouen* : Pr Pablo Urena

*Nancy* : Pr Luc Frimat

*Paris Necker* : Pr Dominique Prié

*Paris Pompidou* : Pr Pascal Houllier, Pr Eric Thervet

*Paris Tenon* : Dr Courbebaisse

*Saint Etienne* : Dr Eric Alamartine

*Nice* : Pr Vincent Esnault, Dr Guillaume Alexandre Favre

*Montpellier* : Pr Bernard Canaud, Dr Leila Chenine Khoualef, Dr H el ene Leray Moragues, Dr Marion Morena

*Lyon* : Pr Denis Fouque

*Lyon Tassin* : Pr Guillaume Jean

*Valenciennes* : Pr Philippe Vanhille
